# Supplementary material for: Skin-like mechanoresponsive self-healing ionic elastomer from supramolecular zwitterionic network
Source: PubMed Central journal article supplement (PMC8253733; doi:10.1038/s41467-021-24382-4), 2021-07-02
Supplement: 41467_2021_24382_MOESM2_ESM.pdf [file 41467_2021_24382_MOESM2_ESM.pdf]

## **Description of Additional Supplementary Files**

File Name: Supplementary Movie 1

Description: High elasticity, mechanical compliance, and adhesion of PAA/betaine elastomer

File Name: Supplementary Movie 2

Description: Self-healing of PAA/betaine elastomer
